# Supplementary material for: Structure-Function Analysis of the Bifunctional CcsBA Heme Exporter and Cytochrome c Synthetase
Source: PubMed Central journal article supplement (PMC6299221; doi:10.1128/mbio.02134-18), 2018-12-18
Supplement: mbo006184227st2.pdf [file mbo006184227st2.pdf]

**Table S2.** Relevant Strains, Plasmids and Primers Employed in this Study

| Strain, Plasmid | Description                                                                                                      | Reference                        |
|-----------------|------------------------------------------------------------------------------------------------------------------|----------------------------------|
| <i>E. coli</i>  |                                                                                                                  |                                  |
| NEB 5- $\alpha$ | fhuA2 $\Delta$ (argF-lacZ)U169 phoA glnV44 $\Phi$ 80 $\Delta$ (lacZ)M15 gyrA96<br>recA1 relA1 endA1 thi-1 hsdR17 |                                  |
| C43(DE3)        | F – ompT hsdSB (rB- mB-) gal dcm (DE3)                                                                           | <i>Miroux and Walker, 1996</i>   |
| RK103           | <i>E. coli</i> MG1655 $\Delta$ ccm::kan <sup>R</sup> , deleted for all ccm genes                                 | <i>Feissner et al, 2006</i>      |
| MS36            | C43 $\Delta$ ccm::kan <sup>R</sup> , deleted for all ccm genes                                                   | This study                       |
| <i>Plasmid</i>  |                                                                                                                  |                                  |
| pRGK332         | pBAD <i>Bordetella pertussis</i> cytochrome c4:His                                                               | <i>Feissner et al, 2006</i>      |
| pRGK368         | pGEX <i>Helicobacter hepaticus</i> GST:CcsBA                                                                     | <i>Richard-Fogel et al, 2007</i> |
| pMCS5           | pGEX GST:CcsBA (H858A aka TM-His1A)                                                                              | <i>Frawley and Kranz, 2009</i>   |
| pMCS10          | pGEX GST:CcsBA (H83G aka TM-His2G)                                                                               | This Study                       |
| pMCS39          | pGEX GST:CcsBA (H761G aka P-His1G)                                                                               | This Study                       |
| pMCS81          | pGEX GST:CcsBA (H83A aka TM-His2A)                                                                               | <i>Frawley and Kranz, 2009</i>   |
| pMCS84          | pGEX GST:CcsBA (H858G aka TM-His1G)                                                                              | This Study                       |
| pMCS106         | pGEX GST:CcsBA (H761A aka P-His1G)                                                                               | <i>Frawley and Kranz, 2009</i>   |
| pMCS107         | pGEX GST:CcsBA (H897A aka P-His2A)                                                                               | <i>Frawley and Kranz, 2009</i>   |
| pMCS109         | pGEXT GST:CcsBA (H83G/H858G aka TM-His2G/TM-His1G)                                                               | This Study                       |
| pMCS147         | pGEX GST:CcsBA (H897G aka P-His2G)                                                                               | This Study                       |
| pMCS154         | pGEX GST:CcsBA (H761G/H897G aka P-His1G/P-His2G)                                                                 | This Study                       |
| pMCS194         | pGEX GST:CcsBA (W833A)                                                                                           | This Study                       |
| pMCS200         | pGEX GST:CcsBA (G834A)                                                                                           | This Study                       |
| pMCS201         | pGEX GST:CcsBA (W837A)                                                                                           | This Study                       |
| pMCS202         | pGEX GST:CcsBA (W839A)                                                                                           | This Study                       |
| pMCS203         | pGEX GST:CcsBA (D840A)                                                                                           | This Study                       |
| pMCS204         | pGEX GST:CcsBA (E843A)                                                                                           | This Study                       |
| pMCS217         | pGEX GST:CcsBA (K842A)                                                                                           | This Study                       |
| pMCS254         | pGEX GST:CcsBA (W828A)                                                                                           | This Study                       |
| pMCS270         | pGEX GST:CcsB*A (aa 659)                                                                                         | This Study                       |
| pMCS272         | pGEX GST:CcsB*A (aa 356) clone 1                                                                                 | This Study                       |
| pMCS275         | pGEX GST:CcsB*A (aa 356) clone 2                                                                                 | This Study                       |
| pMCS289         | pGEX GST:CcsBA(W828C)                                                                                            | This Study                       |
| pMCS290         | pGEX GST:CcsBA(A829C)                                                                                            | This Study                       |
| pMCS291         | pGEX GST:CcsBA(S832C)                                                                                            | This Study                       |
| pMCS292         | pGEX GST:CcsBA(W833C)                                                                                            | This Study                       |
| pMCS293         | pGEX GST:CcsBA(G834C)                                                                                            | This Study                       |
| pMCS294         | pGEX GST:CcsBA(D840C)                                                                                            | This Study                       |
| pMCS295         | pGEX GST:CcsBA(Y836C)                                                                                            | This Study                       |
| pMCS296         | pGEX GST:CcsBA(W839C)                                                                                            | This Study                       |
| pMCS297         | pGEX GST:CcsBA(E843C)                                                                                            | This Study                       |
| pMCS298         | pGEX GST:CcsBA(E831C)                                                                                            | This Study                       |

|         |                                      |            |
|---------|--------------------------------------|------------|
| pMCS299 | pGEX GST:CcsBA(R835C)                | This Study |
| pMCS300 | pGEX GST:CcsBA(G838C)                | This Study |
| pMCS313 | pGEX GST:CcsBA(K842C)                | This Study |
| pMCS316 | pGEX GST:CcsBA(W837C)                | This Study |
| pMCS317 | pGEX GST:CcsBA(N830C)                | This Study |
| pMCS318 | pGEX GST:CcsBA(S841C)                | This Study |
| pMCS319 | pGEX GST:CcsBA(T844C)                | This Study |
| pMCS320 | pGEX GST:CcsBA(W845C)                | This Study |
| pMCS585 | pGEX GST:CcsBA ( $\Delta$ aa358-377) | This Study |
| pMCS586 | pGEX GST:CcsBA ( $\Delta$ aa100-109) | This Study |
| pMCS587 | pGEX GST:CcsBA ( $\Delta$ aa299-308) | This Study |
| pMCS588 | pGEX GST:CcsBA ( $\Delta$ aa536-545) | This Study |

| Oligonucleotide   | Sequence (5' --> 3')                                        | Purpose         | Template |
|-------------------|-------------------------------------------------------------|-----------------|----------|
| CcsBA 1104ins - F | atagcttatgcctcaacacaatgaaggaggacttcacatgtcacaaactgactccagc  | pMCS272 cloning | pRGK368  |
| CcsBA 1104ins - R | gctggaagtcagttgtgacatggtgaagtcctccttcattgtgttgaggcataagctat | pMCS272 cloning | pRGK368  |
| CcsBA H83G - F    | gataaaagagcgcccaagagcaa                                     | pMCS10 cloning  | pRGK368  |
| CcsBA H83G - R    | ctattttctccgcggttctcgtt                                     | pMCS10 cloning  | pRGK368  |
| CcsBA H858G - F   | gcaattatcttaggcttgcgcttgtgtgccc                             | pMCS84 cloning  | pRGK368  |
| CcsBA H858G - R   | cgtaataagaatccgaacgcgaaacaacacgg                            | pMCS109 cloning | pMCS10   |
| MSP5              | gtgcttaaatcttattggctcaacattggcgtctccgtcatca                 | pMCS84 cloning  | pRGK368  |
| MSP6              | tgatgacggagacgccaatgttgagccaataagatttaagcac                 | pMCS109 cloning | pMCS10   |
| MSP7              | ttattatctcacaggtatgggcagctatccgcaggagaa                     | pMCS39 cloning  | pRGK368  |
| MSP8              | ttctctcgcggcatagctgccatactgtgataataa                        | pMCS154 cloning | pMCS147  |
| MSP37             | gccgcctctttatcgttatcatcattggtgcggg                          | pMCS39 cloning  | pRGK368  |
| MSP38             | cccgcaccaatgatgataacgataaaagagcggc                          | pMCS154 cloning | pMCS147  |
| MSP69             | ccaatatctgcccgcagattcattagccaaatgccacca                     | pMCS147 cloning | pRGK368  |
| MSP70             | tggtggcatttgggctaataatctgcgggcagatattgg                     | pMCS147 cloning | pRGK368  |
| MSP71             | ccagcccaaatatctggcccaagattcattagc                           | pMCS81 cloning  | pRGK368  |
| MSP72             | gctaataatcttgggcccagatattggggctgg                           | pMCS81 cloning  | pRGK368  |
| MSP73             | tagaatccagcccgcatactgcccgaagattcattagcc                     | pMCS194 cloning | pRGK368  |
| MSP74             | ggctaataatcttggggcagatatgcgggctgggattcta                    | pMCS194 cloning | pRGK368  |
| MSP75             | ccaagtttcttagaatccgcgcccgaatctgcccga                        | pMCS200 cloning | pRGK368  |
| MSP76             | ttggggcagatattggggcgcggttctaaagaaactgg                      | pMCS200 cloning | pRGK368  |
| MSP77             | cccgaagtttcttagaagcccagcccgaatctctg                         | pMCS201 cloning | pRGK368  |
| MSP78             | cagatattggggctgggcttctaaagaaacttggg                         | pMCS201 cloning | pRGK368  |
| MSP79             | aagtcccgaagtttctgcagaatcccagcccgaatctgc                     | pMCS202 cloning | pRGK368  |
| MSP80             | gcagatattggggctgggattctgcagaacttgggcact                     | pMCS202 cloning | pRGK368  |
|                   |                                                             | pMCS203 cloning | pRGK368  |
|                   |                                                             | pMCS217 cloning | pRGK368  |
|                   |                                                             | pMCS217 cloning | pRGK368  |

|        |                                                                  |                 |         |
|--------|------------------------------------------------------------------|-----------------|---------|
| MSP81  | ctaataagtgcccaagttgctttagaatcccagcccc                            | pMCS204 cloning | pRGK368 |
| MSP82  | ggggctgggattctaaagcaactgggcacttattag                             | pMCS204 cloning | pRGK368 |
| MSP83  | gccccaatatctgccccagattcattagccgcaatgccaccaaggaagtccctactattagc   | pMCS254 cloning | pRGK368 |
| MSP84  | gctaagtgtagggaaactccttgggtggcattgcggtaatgaatcttggggcagatattggggc | pMCS254 cloning | pRGK368 |
| MSP85  | tgataggaattccaaaaactcctacatgaaggaggacttcacatgctccgcttattcac      | pMCS270 cloning | pRGK368 |
| MSP86  | gtgaataagcggacgcatgggtgaagtcctcctcatgtaggagtattttgagaattcctacaa  | pMCS270 cloning | pRGK368 |
| MSP87  | ttccttgggtgcatcttgcgctaatgaatcttgggg                             | pMCS289 cloning | pRGK368 |
| MSP88  | ccccaagattcattagcgcaaatgccaccaaggaa                              | pMCS289 cloning | pRGK368 |
| MSP89  | ctccttgggtgcatcttgggtaatgaatcttggggcaga                          | pMCS290 cloning | pRGK368 |
| MSP90  | tctgccccagattcattacaccaaattgccaccaaggaa                          | pMCS290 cloning | pRGK368 |
| MSP91  | ccttgggtgcatcttgggtgtaattcttggggcag                              | pMCS317 cloning | pRGK368 |
| MSP92  | ctgccccagattcacaagccccaaatgccaccaagg                             | pMCS317 cloning | pRGK368 |
| MSP93  | ttccttgggtgcatcttgggtaatgcttggggcagatattgg                       | pMCS298 cloning | pRGK368 |
| MSP94  | ccaatatctgccccagcaattagcccaaattgccaccaaggaa                      | pMCS298 cloning | pRGK368 |
| MSP95  | ggtggcatttgggctaataatgttggggcagata                               | pMCS291 cloning | pRGK368 |
| MSP96  | tatctgccccaacattcattagcccaaattgccacc                             | pMCS291 cloning | pRGK368 |
| MSP97  | tgggctaataatcttgggcagatattggggc                                  | pMCS292 cloning | pRGK368 |
| MSP98  | gccccaatatctgcccgaagattcattagccca                                | pMCS292 cloning | pRGK368 |
| MSP99  | gggctaataatcttgggtgagatattggggctgg                               | pMCS293 cloning | pRGK368 |
| MSP100 | ccagccccaatatctgcaccaagattcattagccc                              | pMCS293 cloning | pRGK368 |
| MSP101 | gctaataatcttggggctgctattggggctgggattct                           | pMCS299 cloning | pRGK368 |
| MSP102 | agaatcccagccccaatagcagccccagattcattagc                           | pMCS299 cloning | pRGK368 |
| MSP103 | gctaataatcttggggcagatgttggggctggga                               | pMCS295 cloning | pRGK368 |
| MSP104 | tcccagccccaacattctgccccagattcattagc                              | pMCS295 cloning | pRGK368 |
| MSP105 | atcttggggcagatattggcgtgggattctaaa                                | pMCS316 cloning | pRGK368 |
| MSP106 | tttagaatcccagccgcaatatctgccccagat                                | pMCS316 cloning | pRGK368 |
| MSP107 | cttggggcagatattggtgctgggattctaaaga                               | pMCS300 cloning | pRGK368 |
| MSP108 | tctttagaatcccagcacaatatctgccccag                                 | pMCS300 cloning | pRGK368 |
| MSP109 | ggcagatattggggctgctgattctaaagaaactg                              | pMCS296 cloning | pRGK368 |
| MSP110 | caagttctttagaatcgagccccaatatctgcc                                | pMCS296 cloning | pRGK368 |
| MSP111 | gggcagatattggggctggtgtctaaagaaactgggca                           | pMCS294 cloning | pRGK368 |
| MSP112 | tgccccagttctttagaacaccagccccaatatctgccc                          | pMCS294 cloning | pRGK368 |
| MSP113 | atattggggctgggattgtaagaaactgggcac                                | pMCS318 cloning | pRGK368 |
| MSP114 | gtgccccagttcttacaatcccagccccaat                                  | pMCS318 cloning | pRGK368 |
| MSP115 | gcagatattggggctgggattctgcaacttgggcacttattagat                    | pMCS313 cloning | pRGK368 |
| MSP116 | atactaataagtccccagtttgcagaatcccagccccaatatctgc                   | pMCS313 cloning | pRGK368 |
| MSP117 | ggcagatattggggctgggattctaaatgcaacttgggcacttattagat               | pMCS297 cloning | pRGK368 |
| MSP118 | actaataagtccccagtgcatcttagaatcccagccccaatatctgcc                 | pMCS297 cloning | pRGK368 |
| MSP119 | agatattggggctgggattctaaagaatgttgggcacttattag                     | pMCS319 cloning | pRGK368 |
| MSP120 | ctaataagtccccaacattctttagaatcccagccccaatatct                     | pMCS319 cloning | pRGK368 |
| MSP121 | ctgggattctaaagaaactgcgcaacttattagattgtgtga                       | pMCS320 cloning | pRGK368 |
| MSP122 | tacaccaataactaataagtgcgcaagttctttagaatcccag                      | pMCS320 cloning | pRGK368 |

|        |                                                         |                 |         |
|--------|---------------------------------------------------------|-----------------|---------|
| MSP273 | cttgtaaaggtggtatttcattttccaaagcataacaaagtgcactacaaagtgc | pMCS585 cloning | pRGK368 |
| MSP274 | gcactttgtagtgcaactttgttatgcttggaaaatgaaataccacctttacaag | pMCS585 cloning | pRGK368 |
| MSP275 | tggtgcggtattactcgttattatggacaaaagcgtga                  | pMCS586 cloning | pRGK368 |
| MSP276 | tcacgctttgtccataataacgagtaataaccgcacca                  | pMCS586 cloning | pRGK368 |
| MSP277 | ccctgatgaaaaggctctattcctacatacataggctatgc               | pMCS587 cloning | pRGK368 |
| MSP278 | gcatagcctatgtatgtaggaatagagcctttttcatcaggg              | pMCS587 cloning | pRGK368 |
| MSP279 | ccttattfacacagggcaggtgaataaccaatggctctacc               | pMCS585 cloning | pRGK368 |
| MSP280 | gtagagccattggttattcacctgcctgtgtaataagg                  | pMCS585 cloning | pRGK368 |
